# Supplementary material for: An in vivo comparison of wound healing characteristics of two commercial acellular dermal matrices
Source: PubMed Central journal article supplement (PMC8543485; doi:10.1002/cre2.412), 2021-05-03
Supplement: CRE2-7-679-s001.pdf [file CRE2-7-679-s001.pdf]

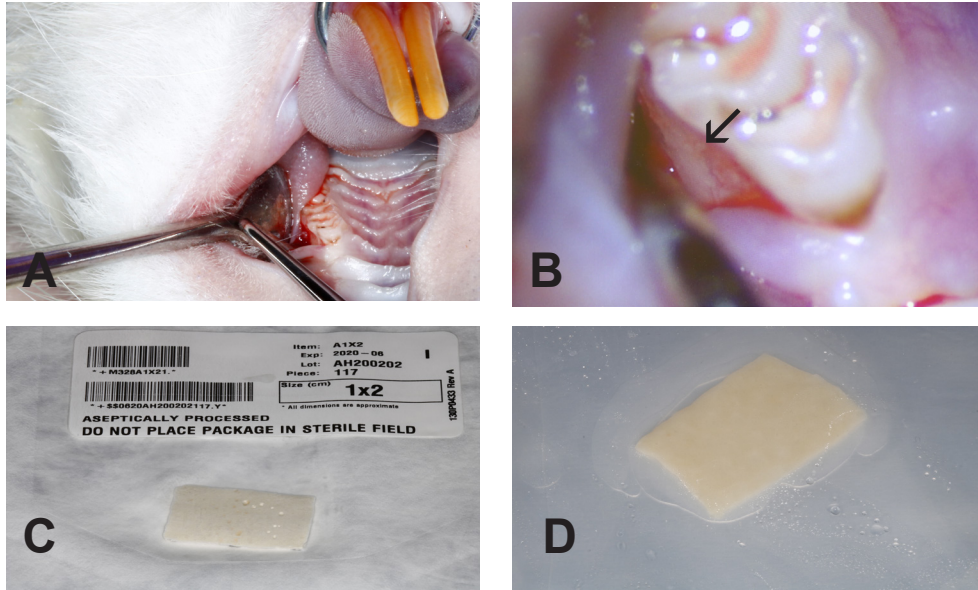

**FIGURE S1: Envelope flap preparation prior to placement of ADM material (A-B, arrow); (C) AlloDerm™ and (D) OrACELL™ prior to hydration and implantation.**
